# Supplementary material for: Identification and Characterization of Neofusicoccum stellenboschiana in Branch and Twig Dieback-Affected Olive Trees in Italy and Comparative Pathogenicity with N. mediterraneum
Source: MDPI journal article supplement (doi:10.3390/jof9030292), 2023-02-23
Supplement: s1 [file s1]

Title:

Identification and characterization of *Neofusicoccum Stellenboschiana* in branch and twig dieback-affected olive trees in Italy and comparative pathogenicity with *N. mediterraneum*

Journal name:

Journal of Fungi - MDPI

Authors:

Giuliano Manetti, Angela Brunetti, Valentina Lumia, Lorenzo Sciarroni, Paolo Marangi, Nicola Cristella, Francesco Faggioli, Massimo Reverberi, Marco Scortichini and Massimo Pilotti

Corresponding author:

Massimo Pilotti

Affiliation:

Institution: Council for Agricultural Research and Economics; Department: Research Center for Plant Protection and Certification (CREA-DC) - Via C. G. Bertero 22, 00156 Rome, Italy

E-mail address:

massimo.pilotti@crea.gov.it

**Text Table S1** Methods for DNA extraction, PCR amplifications and sequencing of DNA regions of *Neofusicoccum Stellenboschiana* isolated from olive trees in Apulia, Latium and Tuscany (Italy). In Table A the DNA regions amplified and primers used are reported. In Table B the thermal cycling for each DNA region is described. Below sequences generated in this study and their accession numbers are also listed.

Genomic DNA (gDNA) of fungal isolates was obtained from 100 mg mycelium sampled from axenic cultures actively growing on sterile cellophane discs (BIO-RAD, Hercules, CA, USA) layered on PDA plates and collected by scraping with a sterile pipette tip. Mycelium samples were powdered with liquid nitrogen, then gDNA was extracted using a DNeasy Plant Mini Kit (Qiagen, Hilden, Germany) following the manufacturer's instructions.

PCR amplifications were carried out on a PCR T100™ Thermal Cycler (BIO-RAD). Reaction assembly was in 50µl volume and contained each primer at 0.2 µM, 2.5 U of High Fidelity Platinum Taq DNA Polymerase (Invitrogen, Thermo Fisher Scientific, Waltham, MA, USA), 0.2 mM (ITS) or 0.4 mM (TUB2 e TEF1-α) of each dNTP, in the buffer supplied by the Taq polymerase manufacturer.

Primer sequences and citations are reported in table A. Thermal cycling is reported in table B.

The PCR products were analysed by agarose gel electrophoresis, excised from gel, and eluted with ISOLATE II PCR and gel kit (Meridian Bioscience, River Hills Drive, Cincinnati, OH, USA) following the manufacturer's instructions. Then amplicons were directly sequenced in both directions by Sanger technology (Bio-Fab research s.r.l. Rome Italy).

**Table A.** DNA regions amplified and primers used

| DNA region     | Forward primer                   | Sequence                       | Reverse primer    | Sequence                       | Citation                               |
|----------------|----------------------------------|--------------------------------|-------------------|--------------------------------|----------------------------------------|
| ITS            | ITS5                             | 5'-GGAAGTAAAAGTCGTAACAAGG-3'   | ITS4              | 5'-TCCTCCGCTTATTGATATGC-3'     | [25]                                   |
| TEF1- $\alpha$ | EF688F                           | 5'-CGGTCACCTTGATCTACAAGTG C-3' | EF1251R           | 5'-CCTCGAACTCACCAGTACCG-3'     | [26]                                   |
| TUB2           | T1- $\beta$ tubulin <sup>1</sup> | 5'-AACATGCGTGAGATTGTAAGT-3'    | Bt2b <sup>2</sup> | 5'-ACCCTCAGTGTAGTGACCCTTGGC-3' | <sup>1</sup> [27]<br><sup>2</sup> [28] |
| RPB2           | fRPB2-6F                         | 5'-TGGGGKWTGGTYTGYCCTGC-3'     | fRPB2-7cR         | 5'-CCCATRGCTTGYTTTRCCCAT-3'    | [29]                                   |

**Table B.** Thermal cycling (35 cycles) to amplify DNA regions used for fungal identification (Blast and phylogeny)

| Loci DNA       | Initial denaturation | Denaturation for each cycle | Annealing | Extension      | Final extension |
|----------------|----------------------|-----------------------------|-----------|----------------|-----------------|
| ITS            | 94°C, 3min           | 94°C, 30s                   | 50°C, 30s | 68°C, 1min 15s | 68°C, 10min     |
| TEF1- $\alpha$ | 94°C, 3min           | 94°C, 30s                   | 55°C, 45s | 68°C, 1min 30s | 68°C, 10min     |
| TUB2           | 94°C, 3min           | 94°C, 30s                   | 50°C, 30s | 68°C, 1min     | 68°C, 10min     |
| RPB2           | 94°C, 3min           | 94°C, 40s                   | 55°C, 30s | 68°C, 1min     | 68°C, 10min     |

## References

25. White, T.J.; Bruns, T.; Lee, S.; Taylor, J. Amplification and direct sequencing of fungal ribosomal RNA genes for phylogenetics. In *PCR protocols: a guide to methods and applications*. Innis, M.A., Gelfand, D.H., Sninsky, J.J., White, T.J., Eds.; Academic Press Inc.: London, United Kingdom, 1990; pp. 315-322. Doi: 10.1016/B978-0-12-372180-8.50042-1.
26. Alves, A.; Crous, P.W.; Correia, A.; Phillips, A.J.L. Morphological and molecular data reveal cryptic speciation in *Lasioidiplodia theobromae*. *Fungal Divers.* **2008**, *28*, 1-13.
27. Glass, N.L.; Donaldson, G. Development of primer sets designed for use with PCR to amplify conserved genes from filamentous ascomycetes. *Appl. Environ. Microbiol.* **1995**, *61*, 1323-1330. Doi: 10.1128/aem.61.4.1323-1330.1995.
28. O'Donnell, K.; Cigelnik, E. Two divergent intragenomic rDNA ITS2 types within a monophyletic lineage of the fungus *Fusarium* are nonorthologous. *Mol. Phylogenet. Evol.* **1997**, *7*(1), 103-116. Doi: 10.1006/mpev.1996.0376.
29. Liu, Y.J.; Whelen S.; Hall B.D. Phylogenetic relationships among ascomycetes: evidence from an RNA polymerase II subunit. *Molecular Biol. Evol.* **1999**, *16*, 1799–1808. Doi: 10.1093/oxfordjournals.molbev.a026092.

## Sequences

>accession Nos\_fungal isolate code DNA locus:

### ITS

>OP893662\_CREA-DC TPR OL.60 ITS

TTTCCGTAGGTGAACCTGCGGAAGGATCATTACCGAGTTGATTTCGAGCTCCGGCTCGACTCTCCCACCCCATG  
TGTACCTACCTCTGTTGCTTTGGCGGGCCGCGGTCTCCGCACCGACCCCCGTTTCGGGGGCGGCCAGCGCCC  
GCCAGAGGACCACAAAACCTCCAGTCAGTAAACGTCGCAGTCTGAGAAACAAGTTAATAAACTAAAACCTTTCAA  
CAACGGATCTCTTGGTTCTGGCATCGATGAAGAACGCAGCGAAATGCGATAAGTAATGTGAATTGCAGAATTC  
AGTGAATCATCGAATCTTTGAACGCACATTGCGCCCCCTTGGTATTCCGAGGGGCATGCCTGTTTCGAGCGTCAT  
TTCAACCCCTCAAGCTCTGCTTGGTATTGGGCTCCGTCTCCGCGGACGCGCCTCGAAGACCTCGGCGGTGGCG  
TCTTGCCTCAAGCGTAGTAGAAAACACCTCGCTTTGGAGCGCACGGCGTCGCCCCGCCGGACGAACCTTTGAAT  
TTTTCTCAAGGTTGACCTCGGATCAGGTAGGGATACCCGCTGAACTTAA

>OP893663\_CREA-DC TPR OL.431 ITS

TTTCCGTAGGTGAACCTGCGGAAGGATCATTACCGAGTTGATTTCGAGCTCCGGCTCGACTCTCCCACCCCATG  
TGTACCTACCTCTGTTGCTTTGGCGGGCCGCGGTCTCCGCACCGACCCCCGTTTCGGGGGCGGCCAGCGCCC  
GCCAGAGGACCACAAAACCTCCAGTCAGTAAACGTCGCAGTCTGAGAAACAAGTTAATAAACTAAAACCTTTCAA  
CAACGGATCTCTTGGTTCTGGCATCGATGAAGAACGCAGCGAAATGCGATAAGTAATGTGAATTGCAGAATTC  
AGTGAATCATCGAATCTTTGAACGCACATTGCGCCCCCTTGGTATTCCGAGGGGCATGCCTGTTTCGAGCGTCAT  
TTCAACCCCTCAAGCTCTGCTTGGTATTGGGCTCCGTCTCCGCGGACGCGCCTCGAAGACCTCGGCGGTGGCG  
TCTTGCCTCAAGCGTAGTAGAAAACACCTCGCTTTGGAGCGCACGGCGTCGCCCCGCCGGACGAACCTTTGAAT  
TTTTCTCAAGGTTGACCTCGGATCAGGTAGGGATACCCGCTGAACTTAA

>OP893664\_CREA-DC TPR OL.438 ITS

TTTCCGTAGGTGAACCTGCGGAAGGATCATTACCGAGTTGATTTCGAGCTCCGGCTCGACTCTCCCACCCCATG  
TGTACCTACCTCTGTTGCTTTGGCGGGCCGCGGTCTCCGCACCGACCCCCGTTTCGGGGGCGGCCAGCGCCC  
GCCAGAGGACCACAAAACCTCCAGTCAGTAAACGTCGCAGTCTGAGAAACAAGTTAATAAACTAAAACCTTTCAA  
CAACGGATCTCTTGGTTCTGGCATCGATGAAGAACGCAGCGAAATGCGATAAGTAATGTGAATTGCAGAATTC  
AGTGAATCATCGAATCTTTGAACGCACATTGCGCCCCCTTGGTATTCCGAGGGGCATGCCTGTTTCGAGCGTCAT  
TTCAACCCCTCAAGCTCTGCTTGGTATTGGGCTCCGTCTCCGCGGACGCGCCTCGAAGACCTCGGCGGTGGCG  
TCTTGCCTCAAGCGTAGTAGAAAACACCTCGCTTTGGAGCGCACGGCGTCGCCCCGCCGGACGAACCTTTGAAT  
TTTTCTCAAGGTTGACCTCGGATCAGGTAGGGATACCCGCTGAACTT

AA

>OP893665\_CREA-DC TPR OL.453 ITS

TTTCCGTAGGTGAACCTGCGGAAGGATCATTACCGAGTTGATTTCGAGCTCCGGCTCGACTCTCCCACCCCATG  
TGTACCTACCTCTGTTGCTTTGGCGGGCCGCGGTCTCCGCACCGACCCCCGTTTCGGGGGCGGCCAGCGCCC  
GCCAGAGGACCACAAAACCTCCAGTCAGTAAACGTCGCAGTCTGAGAAACAAGTTAATAAACTAAAACCTTTCAA  
CAACGGATCTCTTGGTTCTGGCATCGATGAAGAACGCAGCGAAATGCGATAAGTAATGTGAATTGCAGAATTC  
AGTGAATCATCGAATCTTTGAACGCACATTGCGCCCCCTTGGTATTCCGAGGGGCATGCCTGTTTCGAGCGTCAT  
TTCAACCCCTCAAGCTCTGCTTGGTATTGGGCTCCGTCTCCGCGGACGCGCCTCGAAGACCTCGGCGGTGGCG  
TCTTGCCTCAAGCGTAGTAGAAAACACCTCGCTTTGGAGCGCACGGCGTCGCCCCGCCGGACGAACCTTTGAAT  
TTTTCTCAAGGTTGACCTCGGATCAGGTAGGGATACCCGCTGAACTTAA

**translation elongation factor 1-alpha (TEF1-alpha)**

>OQ091952\_CREA-DC TPR OL.60 TEF1-alpha

GGTGGTATCGACAAGCGTACCATCGAGAAGTTCGAGAAGGTGAGAAGATTTTTTCGTTCCGCTGCCCCGCGCGAT  
GGTGCTGGGATGCCGCACTCAATTTGTCTTATCGCTTCGGTGAGGGGCATTTTGGTGGTGGGGTCGGCCCGCG  
CTAAGCCTCGTTTGTGCTTCGGCAAAATCTCCGCATCTGGTTTTTTTTCGACCGGCGTGCGACCGAAGCGCGCC  
CCTCGCCAGACTCGCAGCCACACATGTGCGATCGGACGCTAACGACCGTCTCAGGAAGCTGCCGAGCTCGGCA  
AGGGTTCCTTCAAGTACGCCTGGGTCTTGACAAGCTCAAGGCTGAGCGTGAGCGTGGTATCACCATCGACAT  
TGCCCTCTGGAAGTTCGAGACCCCGAAGTACTATGTCACCGTCATCGACGCCCCCGGTCACCGTGATTTTCATC  
AAGAACATGATCACTGGTACCTCCCAGGCCGACTGCGCCATTCTCATCATTGCCGC

>OQ091953\_CREA-DC TPR OL.431 TEF1-alpha

GGTGGTATCGACAAGCGTACCATCGAGAAGTTCGAGAAGGTGAGAAGATTTTTTCGTTCCGCTGCCCCGCGCGAT  
GGTGCTGGGATGCCGCACTCAATTTGTCTTATCGCTTCGGTGAGGGGCATTTTGGTGGTGGGGTCGGCCCGCG  
CTAAGCCTCGTTTGTGCTTCGGCAAAATCTCCGCATCTGGTTTTTTTTCGACCGGCGTGCGACCGAAGCGCGCC  
CCTCGCCAGACTCGCAGCCACACATGTGCGATCGGACGCTAACGACCGTCTCAGGAAGCTGCCGAGCTCGGCA  
AGGGTTCCTTCAAGTACGCCTGGGTCTTGACAAGCTCAAGGCTGAGCGTGAGCGTGGTATCACCATCGACAT  
TGCCCTCTGGAAGTTCGAGACCCCGAAGTACTATGTCACCGTCATCGACGCCCCCGGTCACCGTGATTTTCATC  
AAGAACATGATCACTGGTACCTCCCAGGCCGACTGCGCCATTCTCATCATTGCCGC

>OQ091954\_CREA-DC TPR OL.438 TEF1-alpha

GGTGGTATCGACAAGCGTACCATCGAGAAGTTCGAGAAGGTGAGAAGATTTTTTCGTTCCGCTGCCCCGCGCGAT  
GGTGCTGGGATGCCGCACTCAATTTGTCTTATCGCTTCGGTGAGGGGCATTTTGGTGGTGGGGTCGGCCCGCG  
CTAAGCCTCGTTTGTGCTTCGGCAAAATCTCCGCATCTGGTTTTTTTTCGACCGGCGTGCGACCGAAGCGCGCC  
CCTCGCCAGACTCGCAGCCACACATGTGCGATCGGACGCTAACGACCGTCTCAGGAAGCTGCCGAGCTCGGCA  
AGGGTTCCTTCAAGTACGCCTGGGTCTTGACAAGCTCAAGGCTGAGCGTGAGCGTGGTATCACCATCGACAT  
TGCCCTCTGGAAGTTCGAGACCCCGAAGTACTATGTCACCGTCATCGACGCCCCCGGTCACCGTGATTTTCATC  
AAGAACATGATCACTGGTACCTCCCAGGCCGACTGCGCCATTCTCATCATTGCCGC

>OQ091955\_CREA-DC TPR OL.453 TEF1-alpha

GGTGGTATCGACAAGCGTACCATCGAGAAGTTCGAGAAGGTGAGAAGATTTTTTCGTTCCGCTGCCCCGCGCGAT  
GGTGCTGGGATGCCGCACTCAATTTGTCTTATCGCTTCGGTGAGGGGCATTTTGGTGGTGGGGTCGGCCCGCG  
CTAAGCCTCGTTTGTGCTTCGGCAAAATCTCCGCATCTGGTTTTTTTTCGACCGGCGTGCGACCGAAGCGCGCC  
CCTCGCCAGACTCGCAGCCACACATGTGCGATCGGACGCTAACGACCGTCTCAGGAAGCTGCCGAGCTCGGCA  
AGGGTTCCTTCAAGTACGCCTGGGTCTTGACAAGCTCAAGGCTGAGCGTGAGCGTGGTATCACCATCGACAT  
TGCCCTCTGGAAGTTCGAGACCCCGAAGTACTATGTCACCGTCATCGACGCCCCCGGTCACCGTGATTTTCATC  
AAGAACATGATCACTGGTACCTCCCAGGCCGACTGCGCCATTCTCATCATTGCCGC

**beta-tubulin 2 (TUB2)**

>OQ091956\_CREA-DC TPR OL.60 TUB2

ACCTGCGCCTGCCCCGCTTGTTTTTCTACGCGTCCCCTGACAGCCCCGCGTCTTGCCCCCGGGCTACGACAACG  
GGGTCAACACCGCTGCGCACTCCTGCTAACGTCGTCTTTTCGCATCCATAGGTTTACCTCCAGACCGGCCAAT  
GCGTAAGTCTCCTCACATCCGCTGGAATCGCTGCATCGCGCTGACTTTGCCCAGGGTAACCAAATCGGTGCTG  
CCTTCTGGTTTGTTGCCAAAACACTGCCGCTCCCGCGCCCCCGCTGACGCGAATCGACACCGCAGGCAGACCA  
TTTCTGGCGAGCACGGCCTGGACGGCTCTGGCGTGTAAGTCTGCGCCGTTTCTTGCGCGAATGGCAATGGCTG  
ACCCGCAGCAGCTACAATGGCACCTCCGACCTCCAGCTCGAGCGCATGAACGTCTACTTCAACGAGGTACTCT  
CTCACTAATCGCACAAACACGTAAAGTATGGCAATCTTCTGAACGCGCAGCAGGCGTGAACAACAAGTACGT  
TCCTCGTGCCGTCCTCGTCGACCTCGAGCCCGGCACCATGGATGCCGTCCGCGCCGGCCCCCTTCGGCCAGCTC  
TTCCGCCCCGACAACCTTTGTCTTCGGCCAGTCTGGTGCCGGTAACAACCTGGG

>OQ091957\_CREA-DC TPR OL.431 TUB2

ACCTGCGCCTGCCCCGCTTGTTTTTCTACGCGTCCCCTGACAGCCCCGCGTCTTGCCCCCGGGCTACGACAACG  
GGGTCAACACCGCTGCGCACTCCTGCTAACGTCGTCTTTTCGCATCCATAGGTTTACCTCCAGACCGGCCAAT  
GCGTAAGTCTCCTCACATCCGCTGGAATCGCTGCATCGCGCTGACTTTGCCCAGGGTAACCAAATCGGTGCTG  
CCTTCTGGTTTGTTGCCAAAACACTGCCGCTCCCGCGCCCCCGCTGACGCGAATCGACACCGCAGGCAGACCA  
TTTCTGGCGAGCACGGCCTGGACGGCTCTGGCGTGTAAGTCTGCGCCGTTTCTTGCGCGAATGGCAATGGCTG  
ACCCGCAGCAGCTACAATGGCACCTCCGACCTCCAGCTCGAGCGCATGAACGTCTACTTCAACGAGGTACTCT  
CTCACTAATCGCACAAACACGTAAAGTATGGCAATCTTCTGAACGCGCAGCAGGCGTGAACAACAAGTACGT  
TCCTCGTGCCGTCCTCGTCGACCTCGAGCCCGGCACCATGGATGCCGTCCGCGCCGGCCCCCTTCGGCCAGCTC  
TTCCGCCCCGACAACCTTTGTCTTCGGCCAGTCTGGTGCCGGTAACAACCTGG

>OQ091958\_CREA-DC TPR OL.438 TUB2

ACCTGCGCCTGCCCCGCTTGTTTTTCTACGCGTCCCCTGACAGCCCCGCGTCTTGCCCCCGGGCTACGACAACG  
GGGTCAACACCGCTGCGCACTCCTGCTAACGTCGTCTTTTCGCATCCATAGGTTTACCTCCAGACCGGCCAAT  
GCGTAAGTCTCCTCACATCCGCTGGAATCGCTGCATCGCGCTGACTTTGCCCAGGGTAACCAAATCGGTGCTG  
CCTTCTGGTTTGTTGCCAAAACACTGCCGCTCCCGCGCCCCCGCTGACGCGAATCGACACCGCAGGCAGACCA  
TTTCTGGCGAGCACGGCCTGGACGGCTCTGGCGTGTAAGTCTGCGCCGTTTCTTGCGCGAATGGCAATGGCTG  
ACCCGCAGCAGCTACAATGGCACCTCCGACCTCCAGCTCGAGCGCATGAACGTCTACTTCAACGAGGTACTCT  
CTCACTAATCGCACAAACACGTAAAGTATGGCAATCTTCTGAACGCGCAGCAGGCGTGAACAACAAGTACGT  
TCCTCGTGCCGTCCTCGTCGACCTCGAGCCCGGCACCATGGATGCCGTCCGCGCCGGCCCCCTTCGGCCAGCTC  
TTCCGCCCCGACAACCTTTGTCTTCGGCCAGTCTGGTGCCGGTAACAACCTGG

>OQ091959\_CREA-DC TPR OL.453 TUB2

ACCTGCGCCTGCCCCGCTTGTTTTTCTACGCGTCCCCTGACAGCCCCGCGTCTTGCCCCCGGGCTACGACAACG  
GGGTCAACACCGCTGCGCACTCCTGCTAACGTCGTCTTTTCGCATCCATAGGTTTACCTCCAGACCGGCCAAT  
GCGTAAGTCTCCTCACATCCGCTGGAATCGCTGCATCGCGCTGACTTTGCCCAGGGTAACCAAATCGGTGCTG  
CCTTCTGGTTTGTTGCCAAAACACTGCCGCTCCCGCGCCCCCGCTGACGCGAATCGACACCGCAGGCAGACCA  
TTTCTGGCGAGCACGGCCTGGACGGCTCTGGCGTGTAAGTCTGCGCCGTTTCTTGCGCGAATGGCAATGGCTG  
ACCCGCAGCAGCTACAATGGCACCTCCGACCTCCAGCTCGAGCGCATGAACGTCTACTTCAACGAGGTACTCT  
CTCACTAATCGCACAAACACGTAAAGTATGGCAATCTTCTGAACGCGCAGCAGGCGTGAACAACAAGTACGT  
TCCTCGTGCCGTCCTCGTCGACCTCGAGCCCGGCACCATGGATGCCGTCCGCGCCGGCCCCCTTCGGCCAGCTC  
TTCCGCCCCGACAACCTTTGTCTTCGGCCAGTCTGGTGCCGGTAACAACCTGG

**DNA-directed RNA polymerase II second largest subunit (RPB2)**

>OQ091960\_CREA-DC TPR OL.60 RPB2

TCCTGATGTGCAACGTCACCGTCGGTAGCGACGTCCTCCCATTCAGGATTTTCATGACCCAGCGGAACATGGA  
GCTTCTGGAAGAGTACGAGCCGAATGTCTCGCCCAATGCCACTAAGATTTTCATCAACGGTGTCTGGGTTGGT  
GTTTCATCGTGACCCAACCCAGCTCGTCTCCGTCGTTAAGAAGCTGCGCCGAGACGGCACCCCTGTCTGCGGAAA  
TGAGTCTTATTCGCGATGTCCGTGACAGGGAGTTCAAGATTTTCACCGATGCAGGTCGAGTGTGCAGGCCCT  
CTTCATCATTGACGACGATCCATTCAGCCCGAATAAGGGGAACCTTGGTCTTGGCCCGAGAGCACATCGACAAA  
CTGGAGGCAGATCAAGAAATCGACGTTTCTGGAATGAACGATGACGAAAGAGATGAGAAGAGGTATGGCTGGA  
AGGGGTTACTGCAGAGCGGTGTGGTCGAGTACATGGATGCGGAAGAAGAGGAGGTTGCGATGATTACCATGAC  
TCCCAGCATTTGAGGGCGCACCACCGAGCTCGTCAAGGCATCATCGATGAAGAAGACGAAGAGAGCAAGCGC  
AACAGGGATCCTCACGAGCGTGTCTGTCGTCGCGCCGCCCAACCCAAGTGTCAGCAGTACACGCATTGCGAGATCC  
ATCCCAGTATGATTCTCGGAATTTGTGCCAGCATCATTCGGT

>OQ091961\_CREA-DC TPR OL.431 RPB2

TCCTGATGTGCAACGTCACCGTCGGTAGCGACGTCCTCCCATTCAGGATTTTCATGACCCAGCGGAACATGGA  
GCTTCTGGAAGAGTACGAGCCGAATGTCTCGCCCAATGCCACTAAGATTTTCATCAACGGTGTCTGGGTTGGT  
GTTTCATCGTGACCCAACCCAGCTCGTCTCCGTCGTTAAGAAGCTGCGCCGAGACGGCACCCCTGTCTGCGGAAA  
TGAGTCTTATTCGCGATGTCCGTGACAGGGAGTTCAAGATTTTCACCGATGCAGGTCGAGTGTGCAGGCCCT  
CTTCATCATTGACGACGATCCATTCAGCCCGAATAAGGGGAACCTTGGTCTTGGCCCGAGAGCACATCGACAAA  
CTGGAGGCAGATCAAGAAATCGACGTTTCTGGAATGAACGATGACGAAAGAGATGAGAAGAGGTATGGCTGGA  
AGGGGTTACTGCAGAGCGGTGTGGTCGAGTACATGGATGCGGAAGAAGAGGAGGTTGCGATGATTACCATGAC  
TCCCAGCATTTGAGGGCGCACCACCGAGCTCGTCAAGGCATCATCGATGAAGAAGACGAAGAGAGCAAGCGC  
AACAGGGATCCTCACGAGCGTGTCTGTCGTCGCGCCGCCCAACCCAAGTGTCAGCAGTACACGCATTGCGAGATCC  
ATCCCAGTATGATTCTCGGAATTTGTGCCAGCATCA

>OQ091962\_CREA-DC TPR OL.438 RPB2

CAACGTCACCGTCGGTAGCGACGTCCTCCCATTCAGGATTTTCATGACCCAGCGGAACATGGAGCTTCTGGAA  
GAGTACGAGCCGAATGTCTCGCCCAATGCCACTAAGATTTTCATCAACGGTGTCTGGGTTGGTGTTCATCGTG  
ACCCAACCCAGCTCGTCTCCGTCGTTAAGAAGCTGCGCCGAGACGGCACCCCTGTCTGCGGAAATGAGTCTTAT  
TCGCGATGTCCGTGACAGGGAGTTCAAGATTTTCACCGATGCAGGTCGAGTGTGCAGGCCCTCTTCATCATT  
GACGACGATCCATTCAGCCCGAATAAGGGGAACCTTGGTCTTGGCCCGAGAGCACATCGACAACTGGAGGCAG  
ATCAAGAAATCGACGTTTCTGGAATGAACGATGACGAAAGAGATGAGAAGAGGTATGGCTGGAAGGGATTACT  
GCAGAGCGGTGTGGTCGAGTACATGGATGCGGAAGAAGAGGAGGTTGCGATGATTACCATGACTCCCAGCAT  
TTGAGGGCGCACCACCGAGCTCGTCAAGGCATCATCGATGAAGAAGACGAAGAGAGCAAGCGCAACAGGGATC  
CTCACGAGCGTGTCTGTCGTCGCGCCGCCCAACCCAAGTGTCAGCAGTACACGCATTGCGAGATCCATCCCAGTAT  
GATTCTCGGAATTTGTGCCAGCATCAT

>OQ091963\_CREA-DC TPR OL.453 RPB2

CTGATGTGCAACGTCACCGTCGGTAGCGACGTCCTCCCATTCAGGATTTTCATGACCCAGCGGAACATGGAGC  
TTCTGGAAGAGTACGAGCCGAATGTCTCGCCCAATGCCACTAAGATTTTCATCAACGGTGTCTGGGTTGGTGT  
TCATCGTGACCCAACCCAGCTCGTCTCCGTCGTTAAGAAGCTGCGCCGAGACGGCACCCCTGTCTGCGGAAATG  
AGTCTTATTCGCGATGTCCGTGACAGGGAGTTCAAGATTTTCACCGATGCAGGTCGAGTGTGCAGGCCCTCT  
TCATCATTGACGACGATCCATTCAGCCCGAATAAGGGGAACCTTGGTCTTGGCCCGAGAGCACATCGACAACT  
GGAGGCAGATCAAGAAATCGACGTTTCTGGAATGAACGATGACGAAAGAGATGAGAAGAGGTATGGCTGGAAG  
GGGTTACTGCAGAGCGGTGTGGTCGAGTACATGGATGCGGAAGAAGAGGAGGTTGCGATGATTACCATGACTC  
CCGACGATTTGAGGGCGCACCACCGAGCTCGTCAAGGCATCATCGATGAAGAAGACGAAGAGAGCAAGCGCAA  
CAGGGATCCTCACGAGCGTGTCTGTCGTCGCGCCGCCCAACCCAAGTGTCAGCAGTACACGCATTGCGAGATCCAT  
CCCAGTATGATTCTCGGAATTTGTGCCAGCATCATTCGGTCCCCGATCAC
