# Supplementary material for: Identification and Characterization of Neofusicoccum stellenboschiana in Branch and Twig Dieback-Affected Olive Trees in Italy and Comparative Pathogenicity with N. mediterraneum
Source: MDPI journal article supplement (doi:10.3390/jof9030292), 2023-02-23
Supplement: s1 [file s1]

Title:

Identification and characterization of *Neofusicoccum Stellenboschiana* in branch and twig dieback-affected olive trees in Italy and comparative pathogenicity with *N. mediterraneum*

Journal name:

Journal of Fungi - MDPI

Authors:

Giuliano Manetti, Angela Brunetti, Valentina Lumia, Lorenzo Sciarroni, Paolo Marangi, Nicola Cristella, Francesco Faggioli, Massimo Reverberi, Marco Scortichini and Massimo Pilotti

Corresponding author:

Massimo Pilotti

Affiliation:

Institution: Council for Agricultural Research and Economics; Department: Research Center for Plant Protection and Certification (CREA-DC) - Via C. G. Bertero 22, 00156 Rome, Italy

E-mail address:

massimo.pilotti@crea.gov.it

**Table S1.** Percentage of nucleotide identity of sequences of Italian isolates of *Neofusicoccum stellenboschiana* with sequences of reference CBS strains of the same species.

| Reference sequences (DNA locus)                                 | <i>Neofusicoccum stellenboschiana</i> Italian isolates |       |        |        |
|-----------------------------------------------------------------|--------------------------------------------------------|-------|--------|--------|
| <i>Neofusicoccum stellenboschiana</i> type strains (ITS)        | OL. 453                                                | OL.60 | OL.431 | OL.438 |
| CBS_110864, AY343407.1 *                                        | 100                                                    | 100   | 100    | 100    |
| CBS_121116, EF445356.1                                          | 99.80                                                  | 99.80 | 99.80  | 99.80  |
| CBS_133326, MT587519.1                                          | 99.80                                                  | 99.80 | 99.80  | 99.80  |
| CBS_110866, MT587518.1                                          | 99.80                                                  | 99.80 | 99.80  | 99.80  |
| <i>Neofusicoccum stellenboschiana</i> type strains (TEF1-alpha) | OL. 453                                                | OL.60 | OL.431 | OL.438 |
| CBS_110864 AY343348.1 *                                         | 99.60                                                  | 99.60 | 99.60  | 99.60  |
| CBS_121116 EF445387.1                                           | 100                                                    | 100   | 100    | 100    |
| CBS_133326 MT592244.1                                           | 100                                                    | 100   | 100    | 100    |
| CBS_110866 MT592242.1                                           | 100                                                    | 100   | 100    | 100    |
| <i>Neofusicoccum stellenboschiana</i> type strains (TUB2)       | OL. 453                                                | OL.60 | OL.431 | OL.438 |
| CBS_110864 KX465047.1 *                                         | 100                                                    | 100   | 100    | 100    |
| CBS_121116 KX465049.1                                           | 100                                                    | 100   | 100    | 100    |
| CBS_133326 MT592736.1                                           | 100                                                    | 100   | 100    | 100    |
| CBS_110866 MT592734.1                                           | 100                                                    | 100   | 100    | 100    |
| <i>Neofusicoccum stellenboschiana</i> type strains (RPB2)       | OL. 453                                                | OL.60 | OL.431 | OL.438 |
| CBS_110864 KX464042.1 *                                         | 100                                                    | 100   | 100    | 99.83  |
| CBS_121116 KX464044.1                                           | 100                                                    | 100   | 100    | 99.83  |
| CBS_133326 MT592433.1                                           | 100                                                    | 100   | 100    | 99.83  |
| CBS_110866 MT592431.1                                           | 100                                                    | 100   | 100    | 99.83  |

\* The first CBS strain used to establish *Neofusicoccum stellenboschiana* species [31] and previously classified as *N. australe*.

## References

31. Yang T.; Johannes Z.; Groenewald J. Z.; Cheewangkoon R.; Jami F.; Abdollahzadeh J.; Lombard L.; Crous P. W. Families, genera, and species of Botryosphaeriales. *Fungal Biol.* **2017**, *121*, 322-346. Doi: 10.1016/j.funbio.2016.11.001.
