# Supplementary material for: Identification and Characterization of Neofusicoccum stellenboschiana in Branch and Twig Dieback-Affected Olive Trees in Italy and Comparative Pathogenicity with N. mediterraneum
Source: J Fungi (Basel). 2023 Feb 23;9(3):292. doi: 10.3390/jof9030292 (PMC10053632; doi:10.3390/jof9030292)
Supplement: Supplementary file 1 [file jof-09-00292-s001.zip]

Archive with 4 entries (4 files):
- Figure_S1.pdf
- Spreadsheet_S1.xlsx
- Table_S1.pdf
- Text_Table_S1.pdf
