# Supplementary material for: Identification and Characterization of Neofusicoccum stellenboschiana in Branch and Twig Dieback-Affected Olive Trees in Italy and Comparative Pathogenicity with N. mediterraneum
Source: J Fungi (Basel). 2023 Feb 23;9(3):292. doi: 10.3390/jof9030292 (PMC10053632; doi:10.3390/jof9030292)
Supplement: Supplementary file 1 [file jof-09-00292-s001.zip › Spreadsheet_S1.xlsx]

## Sheet: Spreadsheet_S1
		Title: Identification and characterization of Neofusicoccum stellenboschiana in branch and twig dieback-affected olive trees in Italy and comparative pathogenicity with N. mediterraneum Journal name: Journal of Fungi - MDPI Authors: Giuliano Manetti, Angela Brunetti, Valentina Lumia, Lorenzo Sciarroni, Paolo Marangi, Nicola Cristella, Francesco Faggioli, Massimo Reverberi, Marco Scortichini and M…
		Species	Culture collection number(s)	Host	Country	GenBank Accession Numbers
						ITS	TEF1-alpha	TUB2	RPB2
	1	Diplodia seriata	CBS 118.82	Vitis vinifera, cane	Italy	KX464109	KX464599	KX464835	KX463965
	2	Neofusicoccum arbuti (ex andinum)	CBS 117452 = CMW 13446	Eucalyptus sp.	Venezuela	DQ306263	DQ306264	KX464922	KX464001
	3	Neofusicoccum arbuti	CBS 116131 = UW01	Arbutus menziesii	USA: Seattle, Washington	AY819720	KF531792	KF531793	KX464003
	4	Neofusicoccum australe	CBS 110851	Vitis vinifera	South Africa	MT587453	MT592162	MT592653	MT592349
	5	Neofusicoccum australe	CBS 113220 = CMW 6853	Sequiadendron giganteum	Australia	AY339263	AY339271	AY339255	MT592353
	6	Neofusicoccum australe	CBS 121115 = STE-U 5807 = CPC 5807	Prunus persica	South Africa	EF445355	EF445386	KX464948	KX464007
	7	Neofusicoccum australe	CBS 139662 = CMW 6837	Acacia sp.	Australia	AY339262	AY339270	AY339254	EU339573
	8	Neofusicoccum brasiliense	CMM 1285	Mangifera indica	Brazil	JX513628	JX513608	KC794030	N.R.
	9	Neofusicoccum brasiliense	CMM 1338	Mangifera indica	Brazil	JX513630	JX513610	KC794031	N.R.
	10	Neofusicoccum buxi	CBS 113714	Buxus sempervirens	Sweden	KX464164	KX464677	KX464954	KX464009
	11	Neofusicoccum buxi	CBS 116.75	Buxus sempervirens, leaf	France	KX464165	KX464678	manca	KX464010
	12	Neofusicoccum cordaticola	CBS 123635 = CMW 14056	Syzygium cordatum	South Africa	EU821903	EU821873	EU821843	EU821933
	13	Neofusicoccum cordaticola	CMW 13992, ex-type = CBS 123634	Syzygium cordatum	South Africa	EU821898	EU821868	EU821838	RHKC01001125:2634-3227_rc
	14	Neofusicoccum cryptoaustrale	CBS 122813 = CMW 23785	Eucalyptus sp.	South Africa	FJ752742	FJ752713	FJ752756	KX464014
	15	Neofusicoccum eucalypticola	CBS 115679 = CMW 6539	Eucalyptus grandis	Australia	AY615141	AY615133	AY615125	N.R.
	16	Neofusicoccum eucalypticola	CBS 115766 = CMW 6217	Eucalyptus rossi	Australia	AY615143	AY615135	AY615127	N.R.
	17	Neofusicoccum eucalyptorum	CBS 115768 = CMW 6233 = BOT 2066	Eucalyptus nitens	Australia	AY615138	AY615130	AY615122	MT592380
	18	Neofusicoccum eucalyptorum	CBS 145975	Eucalyptus sp.	New Zealand	MT587477	MT592190	MT592682	MT592381
	19	Neofusicoccum hellenicum	CERC 1947 = CFCC 50067, ex-type	Pistacia vera	N.R.	KP217053	KP217061	KP217069	N.R.
	20	Neofusicoccum kwambonambiense	CBS 123639 = CMW 14023	Syzygium cordatum	South Africa	EU821900	EU821870	EU821840	EU821930
	21	Neofusicoccum kwambonambiense	CBS 123641 = CMW 14140	Syzygium cordatum	South Africa	EU821919	EU821889	EU821859	EU821949
	22	Neofusicoccum lumnitzerae	CBS 139675	Lumnitzera racemosa	South Africa	MT587480	MT592193	MT592685	MT592384
	23	Neofusicoccum lumnitzerae	CBS 139676	Lumnitzera racemosa	South Africa	MT587481	MT592194	MT592686	MT592385
	24	Neofusicoccum lumnitzerae	CMW 41228	Lumnitzera racemosa	South Africa	KP860882	KP860725	KP860803	KU587926
	25	Neofusicoccum lumnitzerae	CMW 41469, ex-type	Lumnitzera racemosa	South Africa	KP860881	KP860724	KP860801	KU587925
	26	Neofusicoccum luteum	CBS 110862 = CPC 4592	Styphnolobium japonicum	Portugal	MT587482	MT592195	MT592687	MT592386
	27	Neofusicoccum luteum	CBS 133502	Persea americana	USA	MT587483	MT592197	MT592689	MT592388
	28	Neofusicoccum luteum	CBS 562.92	Actinidia deliciosa, lesion on ripe fruit	New Zealand	KX464170	KX464690	KX464968	KX464020
	29	Neofusicoccum luteum	CPC 35429	Viburnum sp.	Italy	MT587489	MT592203	MT592695	MT592394
	30	Neofusicoccum macroclavatum	CBS 114497 = CPC 2147 = JT 625	Grevillea woosinii	USA: Hawaii	AF452534	KX464695	KX464972	KX464021
	31	Neofusicoccum macroclavatum	CBS 118223 = CMW 15955 = WAC 12444, ex-type	Eucalyptus globulus	Australia	DQ093196	DQ093217	DQ093206	KX464022
	32	Neofusicoccum mangiferae	CBS 118532 = CMW 7797	Mangifera indica	Australia	AY615186	DQ093220	AY615173	KX464023
	33	Neofusicoccum mangroviorum	CBS 111492	Protea cynaroides	South Africa	MT587491	MT592205	MT592697	MT592395
	34	Neofusicoccum mangroviorum	CBS 140738	Avicennia marina	South Africa	NR147360	MT592206	MT592698	MT592396
	35	Neofusicoccum mangroviorum	CBS 140740 = CMW 42481	Bruguieria gymnorrhiza	South Africa	MT587493	MT592208	MT592700	MT592398
	36	Neofusicoccum mangroviorum	CMW 41365	Avicennia marina	South Africa	KP860859	KP860702	KP860779	KU587905
	37	Neofusicoccum mediterraneum	CBS 121718 = CPC 13137	Eucalyptus sp.	Greece	MH863145	N.R.	N.R.	KY855815
	38	Neofusicoccum mediterraneum	CREA-DC TPR OL.427	Olea europaea	Italy	OL454501	OL539661	OL539662	N.R.
	39	Neofusicoccum microconidium	CBS 118821	Syzygium cordatum	South Africa	MT587497	MT592212	MT592704	MT592402
	40	Neofusicoccum microconidium	CERC 3497 = CGMCC 3.18750, ex-type	Eucalyptus urophylla x E. grandis	China: ZhanJiang Region	KX278053	KX278158	KX278262	MF410203
	41	Neofusicoccum nonquaesitum	CBS 126655 = L3IE1 = PD484	Umbellularia californica, cankered branch	USA	GU251163	GU251295	GU251823	KX464025
	42	Neofusicoccum nonquaesitum	CBS 133501	Persea americana	USA	MT587498	MT592213	MT592705	MT592403
	43	Neofusicoccum occulatum	CBS 128008 = MUCC 227, ex-type	Eucalyptus grandis hybrid	Australia	EU301030	EU339509	EU339472	EU339558
	44	Neofusicoccum occulatum	MUCC 286	Eucalyptus pellita	Australia	EU736947	EU339511	EU339474	EU339560
	45	Neofusicoccum parvum	CBS 130994	Mangifera indica	Italy	MT587502	MT592217	MT592709	MT592406
	46	Neofusicoccum parvum	CBS 138823 = CMW 9081	Populus nigra	New Zealand	AY236943	AY236888	AY236917	EU821963
	47	Neofusicoccum parvum	CBS 140887	Vitis vinifera cv. Alfrocheiro	Portugal	MT587448	MT592158	MT592648	MT592344
	48	Neofusicoccum pistaciae	CBS 595.76, ex-isotype of Camarosporium pistaciae	Pistacia vera, fruits	Greece	KX464163	KX464676	KX464953	KX464008
	49	Neofusicoccum pistaciarum	CBS 113083	Pistacia vera	USA: California	NR147367	KX464712	KX464998	KX464027
	50	Neofusicoccum pistaciarum	CBS 113084	Sequoia sempervirens	USA: California	KX464187	KX464713	KX464999	KX464028
	51	Neofusicoccum pistaciicola	CBS 113089	Pistacia vera	USA: California	NR168157	KX464727	KX465014	KX464033
	52	Neofusicoccum rapaneae	CBS 145973	Myrsine melanophloeos	South Africa	MT587511	MT592226	MT592718	MT592415
	53	Neofusicoccum rapaneae	CPC 32578	Rapanea sp.	South Africa	MT587512	MT592227	MT592719	MT592416
	54	Neofusicoccum rapaneae	CPC 35288	Myrsine melanophloeos	South Africa	MT587513	MT592228	MT592720	MT592417
	55	Neofusicoccum ribis (ex batangarum)	CBS 124924 = CMW 28363	Terminalia catappa	Cameroon	FJ900607	FJ900653	FJ900634	FJ900615
	56	Neofusicoccum ribis (ex umdonicola)	CBS 123645 = CMW 14058	Syzygium cordatum	South Africa	KF766206	KF766427	KF766145	EU821934
	57	Neofusicoccum ribis	CBS 121.26 = IFO 4837 = CMW7054	Ribes rubrum, cane blight	USA: New York	AF241177	AY236879	AY236908	KX464030
	58	Neofusicoccum sinense	CGMCC 3.18315, ex-type	Unknown woody plant	China: Guizhou Province	KY350148	KY817755	KY350154	N.R.
	59	Neofusicoccum sinoeucalypti	CERC 2005 = CGMCC 3.18752	Eucalyptus urophylla x E. grandis	China: ZhanJiang Region	KX278061	KX278166	KX278270	KX278290
	60	Neofusicoccum sinoeucalypti	CERC 3415	Eucalyptus urophylla x E. grandis	China: BeiHai Region	KX278063	KX278168	KX278272	KX278292
	61	Neofusicoccum stellenboschiana	CBS 110866	Vitis vinifera	South Africa	MT587518	MT592242	MT592734	MT592431
	62	Neofusicoccum stellenboschiana	CBS 121116 = STE-U 6071	Prunus armeniaca	South Africa	EF445356	EF445387	KX465049	KX464044
	63	Neofusicoccum stellenboschiana	CBS 133326	Persea americana	USA	MT587519	MT592244	MT592736	MT592433
	64	Neofusicoccum stellenboschiana	CPC 31232	Persea americana	Greece	MN860179	MN905748	MN905744	MN905740
	65	Neofusicoccum stellenboschiana	CPC 35286	Aloe maculata	South Africa	MT587524	MT592249	MT592741	MT592438
	66	Neofusicoccum terminaliae	CBS 125264 = CMW 26683	Terminalia sericea	South Africa	GQ471804	GQ471782	KX465053	KX464046
	67	Neofusicoccum ursorum	CBS 131679	Afrocarpus falcatus	South Africa	MT587526	MT592252	MT592744	MT592442
	68	Neofusicoccum variabile	CBS 143481 = CMW 37745	Mimusops caffra	South Africa	MH558610	MH576586	MH569155	N.R.
	69	Neofusicoccum variabile	CMW 37742	Mimusops caffra	South Africa	MH558609	MH576585	MH569154	N.R.
	70	Neofusicoccum variabile	CMW 37748	Mimusops caffra	South Africa	MH558612	MH576588	MH569157	N.R.
	71	Neofusicoccum viticlavatum	CBS 112878 = CPC 5044 = JM 86, ex-type	Vitis vinifera	South Africa	AY343381	AY343342	KX465058	KX464048
	72	Neofusicoccum vitifusiforme	CBS 110887 = STE-U 5252	Vitis vinifera	South Africa	MH862869	AY343343	KX465061	KX464049
	73	Neofusicoccum vitifusiforme	CBS 130998	Mangifera indica	Italy	MT587531	MT592259	MT592751	MT592449
	74	Neofusicoccum stellenboschiana	CREA-DC TPR OL.60	Olea europaea	Italy	OP893662	OQ091952	OQ091956	OQ091960
	75	Neofusicoccum stellenboschiana	CREA-DC TPR OL.431	Olea europaea	Italy	OP893663	OQ091953	OQ091957	OQ091961
	76	Neofusicoccum stellenboschiana	CREA-DC TPR OL.438	Olea europaea	Italy	OP893664	OQ091954	OQ091958	OQ091962
	77	Neofusicoccum stellenboschiana	CREA-DC TPR OL.453	Olea europaea	Italy	OP893665	OQ091955	OQ091959	OQ091963
	78	Phaeosphaeria ammophilae	CBS 114595	N.R.	N.R.	KF766146	KF766394	GU349035	GU357746
		N.R. = not reported
		In red sequences obtained in this study
